# Supplementary material for: Study protocol of a randomised, double-blind, placebo-controlled, two-arm parallel-group, multi-centre phase 3 pivotal trial to investigate the efficacy and safety of recombinant human alkaline phosphatase for treatment of patients with sepsis-associated acute kidney injury
Source: HighWire-hosted journal article supplement (doi:10.1136/bmjopen-2022-065613), 2023-04-01
Supplement: bmjopen-2022-065613supp002_data_supplement.pdf [file bmjopen-2022-065613supp002_data_supplement.pdf]

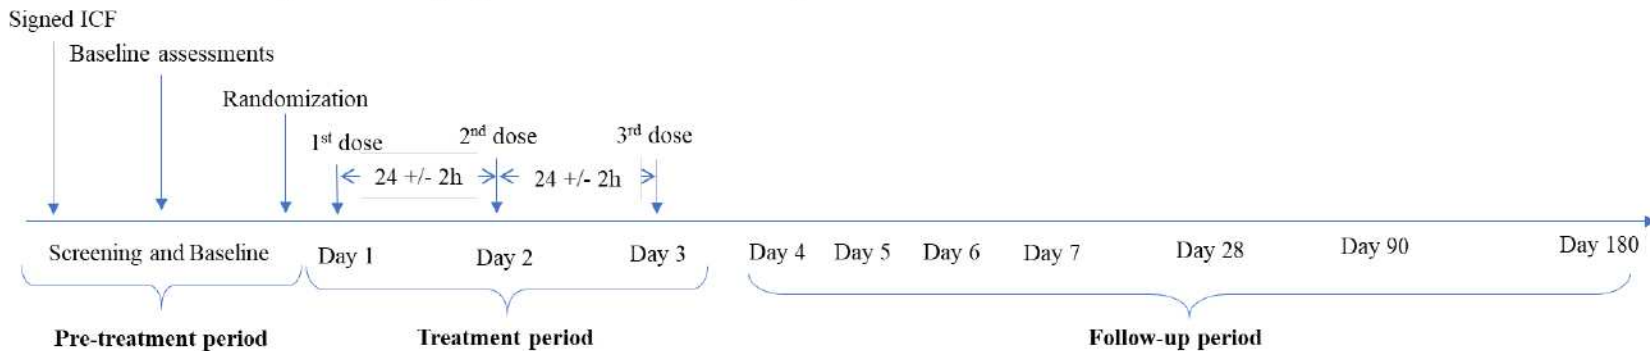

**Figure 3: Trial Flow for the Individual Patient**

The trial consists of a Pre-treatment Period during which Screening, Baseline assessments and Randomization will be performed, a Treatment Period (Day 1 to Day 3) during which the patient will receive a daily 1-hour continuous IV infusion of trial drug, and a Follow-up Period (Day 4 to Day 180) during which follow-up assessments will be performed.

Abbreviations: h = hour; ICF = informed consent form.
